## Running Head: LANGUAGE EXPERIENCE AND NEUROPLASTICITY

### **Neuroplasticity associated with conversational turn-taking following a family-based intervention**

Rachel R. Romeo<sup>1,a</sup>, Julia A. Leonard<sup>1,b</sup>, Hannah M. Grotzinger<sup>1,c</sup>, Sydney T. Robinson<sup>1,d</sup>,  
Megumi E. Takada<sup>1,e</sup>, Allyson P. Mackey<sup>1,b</sup>, Ethan Scherer<sup>2</sup>, Meredith L. Rowe<sup>3</sup>, Martin R.  
West<sup>2,3</sup>, John D. E. Gabrieli<sup>1,3,4</sup>

1. Department of Brain and Cognitive Sciences and McGovern Institute for Brain Research, Massachusetts Institute of Technology
2. Center for Education Policy Research, Harvard University
3. Graduate School of Education, Harvard University
4. Integrated Learning Initiative, Massachusetts Institute of Technology
  - a. Current affiliation: Department of Psychology, Harvard University
  - b. Current affiliation: Department of Psychology, University of Pennsylvania
  - c. Current affiliation: Department of Psychological and Brain Sciences, University of California at Santa Barbara
  - d. Current affiliation: School of Nursing, University of Pennsylvania
  - e. Current affiliation: Graduate School of Education, Stanford University

Corresponding Author:

Rachel R. Romeo

MIT 46-4037

43 Vassar St

Cambridge, MA 02139

[rromeo@mit.edu](mailto:rromeo@mit.edu)

## Running Head: LANGUAGE EXPERIENCE AND NEUROPLASTICITY

### **Abstract**

Children's early language environments are associated with linguistic, cognitive, and academic development, as well as concurrent brain structure and function. This study investigated neurodevelopmental mechanisms linking language input and development by measuring neuroplasticity associated with an intervention designed to enhance language environments in lower-income families. Families of 52 4-to-6 year-old children were randomly assigned to a 9-week, interactive, family-based intervention or no-contact control group. Children completed pre- and post-assessments of verbal and nonverbal cognition, structural magnetic resonance imaging, and two days of auditory recordings to measure language exposure. Families who completed the intervention exhibited a greater increase in the number of adult-child conversational turns. Turn-taking changes correlated positively with changes in verbal, nonverbal, and executive functioning measures, as well as cortical thickening in left inferior frontal and supramarginal gyri, the latter of which mediated the relationship between changes in conversational turns and language scores. This is the first study to investigate longitudinal neuroplasticity in response to changes in children's language environments and suggests that conversational turns support language development through cortical growth in language and social processing regions. This has implications for early interventions to enhance young children's language environments, including family-support programs and addressing systemic barriers to family communication.

### **Keywords**

Neuroplasticity; conversational turns; socioeconomic status; family-based intervention; language development; LENA

## Running Head: LANGUAGE EXPERIENCE AND NEUROPLASTICITY

### Introduction

An abundance of evidence suggests that children's early language environments are intimately associated with their trajectories of language development, which in turn predict cognitive and academic development across childhood (Gilkerson et al., 2018; Huttenlocher et al., 2002; Rowe, 2012; Walker et al., 1994). There is immense variation in children's language environments, and children growing up in homes with lower socioeconomic status (SES) are, on average, exposed to reduced quantity and quality language than peers from higher-SES backgrounds (for review, see Pace et al., 2017; Rowe, 2018; Schwab & Lew-Williams, 2016). Indeed, several studies have shown that the quantity and/or quality of children's early language experience significantly mediate relationships between SES and children's language scores (Hoff, 2003; Romeo, Leonard, et al., 2018; Romeo, Segaran, et al., 2018; Rowe & Goldin-Meadow, 2009), indicating experiential mechanisms which contribute to SES disparities in language development.

Neuroimaging studies have further investigated structural and functional neural mechanisms relating children's language input to their language skills. A study of 4-to-6 year-old children found that the frequency of adult-child conversational turns was positively correlated with brain activation during language processing in left inferior frontal regions (Romeo, Leonard, et al., 2018), as well as the strength of white matter connectivity in the left arcuate and superior longitudinal fasciculi (Romeo, Segaran, et al., 2018). Both neural measures independently mediated relationships between conversational turns and SES-related differences in children's language scores. Similarly, in a study of 5-to-9 year-old children, the quantity of adult words and adult-child conversational turns correlated with the surface area of left perisylvian cortical regions, which mediated SES relationships with children's reading skills (Merz et al., 2020). Additionally, a study of 6-to-12 month-old infants found that the quantity of adult speech related to neuro-oscillatory patterns in parietal regions (Brito et al., 2020), and this effect was greatest in

## Running Head: LANGUAGE EXPERIENCE AND NEUROPLASTICITY

homes with higher self-reported levels of chaos and disorganization. Together, these studies suggest strong relationships between children's language experience and brain measures from infancy through childhood; however, these studies have all employed cross-sectional, correlational methods. Instead, longitudinal controlled intervention studies are necessary to make causal claims about the role of language input on brain development.

While there is limited research on the neural effects of modifying children's language exposure, many randomized controlled trials have investigated the efficacy of interventions on children's linguistic and cognitive development. Parent-implemented language interventions aim to "teach the teacher" and provide caregivers with behaviors and strategies to enhance the input they provide to children, aiming to indirectly affect children's language growth. A meta-analysis of 25 randomized controlled trials targeting children (birth-8 years) with or at risk of language impairment, including 1734 children from lower-SES homes, found that parent-implemented language interventions lead to small-to-modest but reliable improvements in children's expressive language skills (Heidlage et al., 2020). Additionally, several recent studies investigated parent coaching interventions with personalized feedback for families from lower-SES (Leung et al., 2020; McGillion et al., 2017; Wong et al., 2020) and medium-to-high SES (Ferjan Ramirez et al., 2019; Ferjan Ramírez et al., 2020) backgrounds. In all studies, caregivers who received the intervention exposed their children to more words and more conversational turns as measured by child-worn audio-recorders, and in the higher-SES sample, increased turn-taking correlated with children's language growth over the following year. Although these interventions involved detailed, comprehensive programming, even brief, "light touch" interventions have been shown to be effective in increasing the amount of parent-child conversation and measures of children's expressive language (Leech & Rowe, 2020). The efficacy of input-modifying interventions on children's language skills raises questions about the underlying neurobiological mechanisms.

## Running Head: LANGUAGE EXPERIENCE AND NEUROPLASTICITY

The present study aims to fill this gap by investigating whether and how children's brain structure and cognition changes in response to a family-based intervention designed to enhance parent-child communication in families of preschoolers from lower-SES backgrounds. The intervention employed was a direct replication and extension of an interactive, small-group program designed to improve children's cognition through a variety of family communication practices (Neville et al., 2013). Families assigned to that intervention group demonstrated more balanced (versus parent-dominated) adult-child verbal turn-taking during a free-play session, and children also demonstrated intervention-related increases in receptive language skills. The present study uses naturalistic measures of children's real-world language exposure over two days to measure changes in the quantity of input and conversational experience and relates this change to growth in children's verbal and nonverbal cognition and neuroanatomical growth. We specifically focus on structural cortical measures to investigate experience-related neuroanatomical plasticity during a developmental period of typical cortical thinning (Remer et al., 2017).

We hypothesized that families who completed the intervention would exhibit increased conversational turn-taking and improvements to children's language scores, and that cortical thickening in left hemisphere perisylvian regions would mediate the relationship between turn-taking and children's language development. Anticipating individual variability, we also examined relationships amongst longitudinal changes in language experience, cognitive assessments, and cortical thickness both within the intervention and control groups and collapsing across groups. This analysis has the advantage of maximizing statistical power at the expense of a causal design.

## Running Head: LANGUAGE EXPERIENCE AND NEUROPLASTICITY

### Materials and Methods

#### *Participants*

Participants include 52 children (32 male, 20 female) enrolled in either pre-kindergarten ( $n=14$ ) or kindergarten ( $n=38$ ), aged 4 years, 5 months to 7 years, 1 months ( $M=5.79$  years,  $SD=0.60$  years). A total of 50 families participated, including one pair of twins and one sibling pair aged 1 year apart, and were a subset of participants from a larger intervention study (Romeo & Leonard, et al., under review). A total of 107 children (102 families) were recruited from eight over-subscribed public charter schools in metropolitan Boston that serve primarily lower-income families, and participated in an in-school battery of cognitive assessments. All families were invited to participate in additional in-lab assessments, neuroimaging, and home language recording, and the present sample are all families who participated in these assessments. Two children (both in the control group) did not return for the in-lab post-test session but did complete the in-school post-test session. A parent or legal guardian provided written informed consent, all children provided verbal informed assent, and all procedures were approved by the Massachusetts Institute of Technology institutional review board.

A primary caregiver reported the child's demographics. Race/ethnicity ("select all that apply") included  $n=5$  White/Caucasian,  $n=25$  Black/African American,  $n=29$  Hispanic/Latinx,  $n=1$  Asian,  $n=1$  Native American/American Indian,  $n=2$  Native Hawaiian/Pacific Islander, and  $n=1$  Other (self-identified as Cape Verdean); nine participants selected more than one race/ethnicity. Although race/ethnicity are reported for descriptive purposes, neither is used as an independent variable or covariate based on current best practices, in favor of more proximal potential explanatory factors (APA, 2019; Helms et al., 2005). Thirty-four children lived with two parents/caregivers, 17 with one parent/caregiver (of which 7 split time with a second parent), and 1 with a non-parental legal guardian. Parental education (average of both parents, if a two-parent household) varied from 6<sup>th</sup> grade to advanced degree, and was ordinally coded into five

## Running Head: LANGUAGE EXPERIENCE AND NEUROPLASTICITY

bins: less than high school ( $n=7$ ), high school ( $n=20$ ), some college ( $n=13$ ), four year college degree ( $n=10$ ), or advanced degree ( $n=2$ ), such that the median was a high school education. Annual total household income ranged from less than \$6,000 (inclusive of benefits) to \$160,000 with a median of \$53,500 ( $M=\$61,073$ ,  $SD=\$42,172$ ), and income-to-needs based on family size and the federal poverty level ranged from 0.24-6.68 ( $Med=2.38$ ). However, given the high cost of living relative to federal guidelines, participants were additionally classified by regional HUD Income Limits (<https://www.huduser.gov/portal/datasets/il.html>) into five ordinal bins: “extremely low income” ( $n=14$ ), “very low income” ( $n=9$ ), “low income” ( $n=11$ ), “below median income” ( $n=8$ ), and “above median income” ( $n=10$ ). The 5-point ordinal scales for parental education and regional income were highly intercorrelated (Spearman’s  $\rho=.638$ ,  $p<.001$ ), but were considered separately in all SES analyses because of potentially differing relationships with child development (Duncan & Magnuson, 2012). All children were native English speakers, though twenty-four (46%) children were reported to know/speak an additional language with moderate proficiency ( $n=16$  Spanish,  $n=6$  Haitian Creole,  $n=2$  Cape Verdean Creole).

In effort to establish a scalable intervention model, all children from the target grades in each school were invited to participate in the intervention. The only exclusion criterion for in-lab participation was MRI contraindications (e.g., non-removable metal). Thus, the present sample of children includes eight children who might otherwise be excluded from language studies, including six children with Individualized Education Plans for speech/language, one child born premature (29 weeks gestation), and one child taking medication for Attention Deficit Hyperactive Disorder (methylphenidate). Children were otherwise typically developing. No reported effects change if developmental typicality is covaried.

## Running Head: LANGUAGE EXPERIENCE AND NEUROPLASTICITY

### *Study Timeline*

Families were recruited over a three-month period preceding the start of the intervention. All families who consented to participate in in-school pre-post assessments ( $n = 101$ ) were invited to participate in a supplemental in-lab session including additional pre-post cognitive assessments, neuroimaging, and home language recording, and 50 families (49%) did so. Children completed the same battery of assessments before (pretest) and after (posttest) the intervention period. The intervention period lasted 10 weeks (8 core curriculum weeks, 1 introductory week, and 1 spring break week). In-school testing occurred in the two weeks immediately preceding and following the intervention period, and in-lab testing occurred simultaneously in the 6 weeks immediately preceding and following the intervention period (overlapping with in-school testing). Home audio recordings typically occurred the weekend following the in-lab session ( $M = 8.50$  days after,  $SD = 4.75$  days) and never occurred during the intervention time-period. No time differences between sessions (in-school, in-lab, or home audio) or between pre-post timepoints differed between assigned groups (all  $p > .2$ ). Random assignment occurred after the completion of all pretesting, but because scoring had not been completed, it did not account for any pretest measures.

### *Cognitive Assessments*

Children completed a battery of standardized behavioral assessments to characterize verbal skills, nonverbal intelligence, and executive functioning. Descriptive statistics of measures are presented in Table 1. All measures except for the *Clinical Evaluation of Language Fundamentals* (CELF-5) (Wiig et al., 2013) were completed in school as a part of the full-sample assessment, while the CELF-5 was completed in lab immediately preceding the neuroimaging session.

Verbal assessments included the *Peabody Picture Vocabulary Test* (PPVT-4) (Dunn & Dunn,



## Running Head: LANGUAGE EXPERIENCE AND NEUROPLASTICITY

2007), which measures receptive vocabulary knowledge, and four subtests comprising the Core Language Score (CLS) of the CELF-5, which includes Sentence Comprehension (measures general receptive language), Word Structure (measures expressive morphosyntax), Formulated Sentences (measures expressive semantics and morphosyntax), and Recalling Sentences (measures verbal memory and general expressive language). Because the CELF-5 is age-normed for children aged 5-21 years, standard scores are unavailable for n=7 participants who were 4 years-old at the time of assessment. This assessment was chosen because pilot testing with language assessments designed for younger children revealed ceiling effects for older students and presumably would have allowed for minimal growth after intervention. PPVT-4 data were invalid for one child at pretest and another child at posttest; all CELF-5 data were valid. Standard scores from the two language assessments were averaged to create a composite language score, except where only one standard score was available.

Nonverbal cognitive assessments included three subtests of the *Wechsler Preschool and Primary Scale of Intelligence* (WPPSI-IV) (Wechsler, 2012), which included Matrix Reasoning (measures nonverbal fluid reasoning), Picture Memory (measures nonverbal working memory), and Bug Search (measures nonverbal processing speed). Age-normed scaled scores from the three WPPSI-IV subtests were averaged to create a composite nonverbal IQ score. Bug Search data were invalid for one child at pre-test and another child at post-test, so for these two children, the other two measures (Matrix Reasoning and Picture Memory) were averaged to create a nonverbal IQ composite score.

Executive functioning was measured by the Head-Knees-Toes-Shoulders (HKTS) task (McClelland et al., 2014) and the Hearts and Flowers (HF) version of the dots task (Davidson et al., 2006), both of which require children to follow directions that involve changing instructions to tap inhibition and cognitive flexibility skills. In HKTS, children are first asked to touch their head

## Running Head: LANGUAGE EXPERIENCE AND NEUROPLASTICITY

when told to touch their toes and vice versa (10 trials), then two more body parts (knees and shoulders) are added to the command sequence and opposite commands continue (10 trials), and finally, the rules are changed (i.e., head goes with knees, and toes go with shoulders, 10 trials). Children received six practice items before each block. A score of 0 is given for an incorrect response, 1 for a self-correct, and 2 for a fully correct response, bringing the maximum score to 60. HF was presented on a touch-screen tablet via the Presentation program by Neurobehavioral Systems (Berkeley, CA). In each trial, a red heart or flower would appear on the right or left side of the screen. First, children are told to press the button on the same side as the stimulus (congruent block, 12 trials), then to press the button on the opposite side of the stimulus (incongruent block, 12 trials), and finally to press the same side as heart but the opposite side of a flower (mixed block, 49 trials). For all conditions, stimuli were displayed for 500 msec with 1500 msec to respond and an interstimulus interval of 500 msec. Children received up to 12 practice trials before each block. The two outcome measures include accuracy (percent correct) and reaction time on correct trials (in milliseconds) across the incongruent and mixed blocks combined. Any response faster than 200 msec was considered to be anticipatory (Davidson et al., 2006) and thus were excluded from analyses, and the first trial of the mixed block was also excluded. HKTS data was invalid for two children at posttest; HF data was valid for all children. HKTS total score, HF accuracy, and HF reaction time (reversed) were z-scored and averaged to form an executive functioning composite score.

### *Neuroimaging Data Acquisition and Analysis*

Child participants completed identical neuroimaging sessions at pre-test and post-test. First, children were acclimated to the MRI environment and practiced lying still in a mock MRI scanner. Data were then acquired on a 3 Tesla Siemens MAGNETOM Trio Tim scanner equipped for echo planar imaging (EPI; Siemens, Erlangen, Germany) with a 32-channel phased array head coil. A whole-head, high-resolution T1-weighted multi-echo MPRAGE (van

## Running Head: LANGUAGE EXPERIENCE AND NEUROPLASTICITY

der Kouwe et al., 2008) structural image was acquired while children watched a movie of their choice, using a protocol optimized for movement-prone pediatric populations (Tisdall et al., 2012) (TR = 2530 ms, TE = 1.64 ms/3.5 ms/5.36 ms/7.22 ms, TI = 1400 ms, flip angle = 7°, resolution = 1-mm isotropic). The scan session also included a story-listening task, resting state, and a diffusion weighted scan (all collected after the structural scan), but structural measures were chosen as current measure of interest because it had the largest number of participants with two timepoints of usable data. All neuroimaging took place at the Athinoula A. Martinos Imaging Center at the Massachusetts Institute of Technology.

T1-weighted images from both time points were visually inspected for image quality (based on a guide of artifacts associated with motion) by two trained observers blind to all participant measures. Additionally, image quality was objectively quantified by QoalaT (Klapwijk et al., 2019), a supervised learning tool for evaluating structural MRI images. One participant's imaging data from timepoint 1 was dropped for failing both subjective and objective quality control. Additionally, three participants chose not to complete imaging at both timepoints, one participant chose not to complete imaging at the second timepoint, and two participants did not return for the second in-lab session which included imaging (timepoint 1 n=48, timepoint 2 n=46, longitudinal n=45). QoalaT scores of included participants were highly correlated between timepoints ( $r(43)=.697$ ,  $p<.001$ ) indicating consistent within-participant scan quality. Quality ratings were not significantly correlated with any cognitive or demographic variables, and did not differ by intervention group (all  $p>.1$ ).

Surface-based cortical reconstruction was conducted with FreeSurfer v5.3.0 (Fischl 2012). Two trained researchers manually edited pial and white matter surfaces as needed, and a third researcher confirmed the accuracy of the final surfaces. T1 images from both timepoints were processed with FreeSurfer's longitudinal stream (Reuter et al. 2012). This process estimates

## Running Head: LANGUAGE EXPERIENCE AND NEUROPLASTICITY

average participant anatomy by creating an unbiased within-participant template space (Reuter and Fischl 2011) using a robust, inverse consistent registration (Reuter et al. 2010) and resampling cross-sectional images to the template. Within-participant templates and resampled cross-sectional reconstructions were manually edited and checked (as above), and then warped to a standard brain (fsaverage) and smoothed with a 15-mm full-width half-maximum kernel. General linear models were constructed with a dependent variable of symmetrized percent change (SPC), which is the rate of change at each surface vertex with respect to the average thickness across both timepoints. SPC is more robust than rate of change or simple percent change, which refer to change only in terms of the first measurement. All analyses controlled for participant age and gender. Whole-brain analyses were cluster-corrected for multiple comparisons using a Monte Carlo simulation with 10,000 repetitions with absolute cluster-forming  $p < .01$  and cluster-wise  $p < .001$ , Bonferroni adjusted for both hemispheres (Hagler et al., 2006).

### *Home Audio Recordings*

At each in-lab session, parents were introduced to the Language Environment Analysis (LENA) recording system and how to use it (Gilkerson et al., 2017). Following both pretest and posttest in-lab sessions, parents were mailed two LENA Pro digital language processors (DLPs), which are small 2-ounce digital recorders that fit in a shirt pocket and store up to 16 hours of digitally recorded audio (Ford et al., 2008). Parents were instructed to collect two full-day recordings from consecutive days when the child was not in school (typically the Saturday and Sunday following the in-lab session), beginning when the child wakes up, and to conduct their days as normal. Due to technical difficulties, four total recording timepoints contained only one day of recording. After families mailed back the DLPs, LENA software employed validated speech-identification algorithms (Xu et al., 2009) to automatically segment the audio and provide estimates of 1) the number of adult words spoken to the child (AWC), 2) the number of child

## Running Head: LANGUAGE EXPERIENCE AND NEUROPLASTICITY

vocalizations at the utterance level (CVC), and 3) the number of adult-child conversational turns (CTC), defined as a discrete pair of an adult vocalization followed by a child vocalization, or vice versa, with no more than 5 seconds pause between the two. Parents of 9 children (including a sibling pair) either declined to participate in the LENA recording or provided unusable recordings at the first time point (valid n=43), plus an additional 4 children at the posttest timepoint (valid longitudinal n=39: 21 intervention, 16 control, 2 non-comply).

Although parents were instructed to keep the recorder on and with the child for full days, the recorder was occasionally turned off (sometimes by accident) or removed from the child (e.g., during bath time, sports practices, etc.). A combination of parent-reported activity logs and the raw audio recordings were screened for times when the recorder was off, not on the child's person, or the child was asleep, and these segments were removed from analysis. Mean hourly AWC, CVC, and CTC were calculated by dividing each total count metric by the total duration of usable recording hours across both days (mean analyzed hours per timepoint = 21.41 hours, SD = 6.10 hours).

### *Intervention*

Participants were randomly assigned at the family level to either attend a family-based intervention program or a business-as-usual control group. Random assignment was done within the full in-school sample (n=107, see Participants section above), stratifying for school and whether participants had completed the additional in-lab session. Within the present sample, n=27 participants (including one sibling pair) were assigned to the intervention, and n=25 participants (including one sibling pair) were assigned to the control group. Three participants (no siblings) assigned to the intervention group did not attend the intervention ("non-compliers") and are excluded from analyses investigating intervention efficacy, but because they completed all measures at both timepoints, they are included in longitudinal correlational

## Running Head: LANGUAGE EXPERIENCE AND NEUROPLASTICITY

analyses. Intent-to-treat analyses including these children in the intervention group are reported in the Supplement. Groups did not differ on any demographic measure, or baseline environmental or cognitive measures (all  $p > .19$ ).

The intervention was a near-exact replication of the Parents and Children Making Connections – Highlighting Attention (PCMC-A) program designed by Neville and colleagues (Neville et al., 2013), and this specific replication is described in detail elsewhere (Romeo & Leonard, under review). Briefly, PCMC-A consists of eight weekly small group sessions (4-5 families per group) in which parents/caregivers participate in a two-hour interactive curriculum of strategies to target family stress regulation, contingency-based discipline, parental responsiveness and language use, and facilitation of child attention, while children simultaneously participate in a parallel 45-minute child curriculum involving multi-sensory activities and games aimed to increase self-regulation of attention and emotion states. Between sessions, parents were asked to try the strategies at home, and they received weekly 15-minute check-in phone calls from group facilitators to discuss implementation and effectiveness of the strategies. Parents assigned to the intervention had the choice of attending groups led in either English ( $n=20$ ) or Spanish ( $n=4$ ), while the child component of the intervention was delivered in English, to match the children's language of instruction at school. Make-up sessions were available if a family missed a scheduled session. During sessions, families received a free meal, child-care for any siblings or other children under the adults' care, a travel reimbursement, and the opportunity to win additional incentives.

While the PCMC-A curriculum includes eight distinct topics primarily designed to improve children's self-regulation skills, many of the lessons explicitly target parent-child communication practices and language use. For example, one module focused on optimizing learning through play by instructing parents to follow the child's interests/attention and to balance conversation

## Running Head: LANGUAGE EXPERIENCE AND NEUROPLASTICITY

during play by letting child start talking first, taking a turn after the child (using social language to model new vocabulary and concepts), and counting to five if they realize they are doing all the talking without letting the child engage. Another module instructs parents to use “meaningFULL” language which incorporates open-ended questions that encourage a child response (as opposed to meaningless questions to which a child’s response is irrelevant), and to increase specific verbal praise in response to children’s actions. Additional modules target using clear communication that is pleasant and respectful, is age-appropriate in content and structure, makes use of routines, maintains the child’s attention, and verbalizes thinking, emotions, and actions. Throughout all lessons, parents are encouraged to be more aware of their language use, tune in to their child’s verbal and nonverbal communication, and aim to balance communication in parent-child connections.

### Results

At baseline, the two groups did not significantly differ on any demographic, cognitive, experiential, or neural measures (all  $ps > .19$ ). Baseline correlations between SES, language environment, and child cognitive scores (collapsed across groups) are reported in Supplementary Table 1.

#### *Intervention Effects on Experiential and Cognitive Measures*

The efficacy of the intervention on LENA and cognitive measures was evaluated with repeated measures ANOVAs with time point as the within-subjects variable and group as the between-subjects variable. A significant time by group interaction (Figure 1, Table 1) revealed that families who attended the intervention exhibited a greater increase in average hourly conversational turns than families in the control group [ $F(1,35)=6.63, p<.05, \text{partial } \eta^2=.16$ ; mean change intervention = +4.24; control = -7.01], in addition to a marginal increase in the average hourly adult words [ $F(1,35)=2.89, p=.098, \text{partial } \eta^2=.08$ ; mean change intervention =

## Running Head: LANGUAGE EXPERIENCE AND NEUROPLASTICITY

+189.83; control = -55.25]. The effect of the intervention on conversational turns remained significant when controlling for sex, age, SES, language of intervention delivery, or child bilingualism (all  $p$ s<.05), nor did any demographic factor moderate intervention effectiveness. There were no group differences in changes in the number of child vocalizations.

A main effect of time on the language and nonverbal composites revealed that all children on average exhibited increases in language [ $F(1,47)=11.88$ ,  $p<.001$ , partial  $\eta^2=.20$ ; mean change = +3.49] and nonverbal IQ [ $F(1,47)=22.41$ ,  $p<.001$ , partial  $\eta^2=.32$ ; mean change = +.79]. There was no main effect of time on executive functioning. However, a significant time by group interaction (Figure 1, Table 1) revealed that children whose families attended the intervention exhibited a relative increase in executive functioning scores compared to peers in the control group [ $F(1,47)=4.97$ ,  $p<.05$ , partial  $\eta^2=.10$ ; mean change intervention = +.21; control = -.14], in addition to a marginally greater increase in nonverbal IQ scores [ $F(1,47)=3.34$ ,  $p=.07$ , partial  $\eta^2=.07$ ; mean change intervention = +1.17 control = +.52] (however, see Romeo & Leonard et al., under review, for results in the full sample). There was no time by group interaction on language scores, as children in both groups increased comparably (mean change intervention = +3.72; control = +3.48).

### *Longitudinal Changes in Language and Cognition*

To determine how longitudinal changes in language environment related to changes in cognitive scores, we examined pre-to-post changes both within the intervention and control groups, and in both groups combined. Collapsing across groups, the magnitude of change in conversational turns was significantly correlated with the magnitude of change in language [ $r(37)=.37$ ,  $p<.05$ ], nonverbal IQ [ $r(37)=.39$ ,  $p<.05$ ], and executive functioning [ $r(37)=.48$ ,  $p<.01$ ] (Figure 2, Table 2). There was not significant relationship between changes in adult words or child vocalizations with any cognitive measure. Additionally, group significantly moderated the relationship between



## Running Head: LANGUAGE EXPERIENCE AND NEUROPLASTICITY

changes in conversational turns and language scores [ $t(35)=2.28, p<.05$ ], such that children in the intervention group exhibited a strong positive correlation between change in conversational turns and change in language scores [ $r(19)=.57, p<.01$ ], while children in control group did not show any relationship. There was no moderation by group for nonverbal IQ or executive functioning. Finally, bootstrapped mediation models were performed to determine whether the change in language scores mediated the relationships between changes in conversational turns and nonverbal IQ, and between conversational turns and executive functioning. Neither mediation was significant, suggesting that conversational turns had a direct effect on both nonverbal measures, in addition to language. Notably, no demographic measure (sex, age, parental education, family income, bilingualism, or developmental typicality) was associated with changes in any cognitive or LENA measure, either within groups or across the entire group.

### *Intervention Effects on Neuroplasticity*

There were no significant between-group differences in cortical plasticity from first to second timepoint. However, across all participants combined, the magnitude of change in conversational turns was significantly positively correlated with cortical plasticity in two left hemisphere perisylvian clusters (Figure 3, Table 3). Specifically, increases in conversational turns were associated with cortical thickening in a cluster in the left inferior frontal gyrus (IFG), extending over pars opercularis and pars triangularis, as well as a cluster in the left supramarginal gyrus (SMG) at the intersection of the inferior parietal lobe and the posterior temporal lobe. To aid in interpretation of these correlations, participants were divided into two groups by a median split on the magnitude of change in conversational turns, which also corresponded to a division into those with increased turns and those with decreased turns. Children who experienced increased turns exhibited a mean of 0.29% (8.41  $\mu\text{m}$ ) *thickening* in the IFG cluster and 0.24% (6.96  $\mu\text{m}$ ) thickening in the SMG cluster, while children who experienced a decrease in turns exhibited 0.36% (10.44  $\mu\text{m}$ ) *thinning* in the IFG cluster and

## Running Head: LANGUAGE EXPERIENCE AND NEUROPLASTICITY

0.24% (9.86  $\mu\text{m}$ ) thinning in the SMG cluster. There were no significantly correlated regions in the right hemisphere, and there were no regions where adult words or child vocalizations were significantly correlated with plasticity.

To test whether plasticity in the significant clusters was a mechanism relating change in conversational turns to changes in children's cognitive scores, bootstrapped, bias-corrected mediation analyses were performed. Results revealed that plasticity in the SMG cluster mediated the relationship between conversational turn changes and language score changes [indirect effect = 0.08, 95% CI = (0.005, 0.180), indirect/total effect = 0.57], such that SMG plasticity could account for 57% of the total effect of conversational turns on language scores. The IFG cluster did not significantly mediate the turns-language relationship, and neither cluster mediated relationships with nonverbal IQ or executive functioning.

### **Discussion**

The present study investigated cortical neuroplasticity associated with changes to children's language environments following a randomized controlled trial of a family-based intervention for families from primarily lower-SES backgrounds. Families who completed the intervention exhibited greater increases in the quantity of adult-child conversational turns compared to a passive control group, regardless of family SES. Although there was no effect of group on child-level cognitive or neural measures, across both groups combined, the magnitude of conversational-turn change was positively correlated with changes in children's language scores, nonverbal cognition, and executive functioning. Conversational turn changes were also positively correlated with longitudinal cortical thickening in left inferior frontal and supramarginal cortices, and plasticity in the supramarginal cluster mediated the relationship between conversational turn and language score changes. These results represent the first investigation into the mechanisms of neuroplasticity that underlie changes to children's language

## Running Head: LANGUAGE EXPERIENCE AND NEUROPLASTICITY

environments, and suggest that conversational turns support children's language development through growth in specific left perisylvian brain regions.

Although the employed intervention covered a wide range of family-based strategies for supporting children's broader cognitive development, the crux of the curriculum focused on adult-child communication practices, and specifically parental responsiveness and "meaningFULL" language use. The original evaluation of this intervention found that families who completed the intervention demonstrated more balanced (versus parent-dominated) adult-child verbal turn-taking during an 8-minute in-lab play session (Neville et al., 2013). The present study found commensurate results using a different methodology, specifically two days of "real-world" audio recordings of children's language environments, suggesting that the intervention's effect on children's communication experiences extend to more naturalistic circumstances. Importantly, this result remained significant after controlling for family SES (both parental education and household income), suggesting that the intervention is equally effective on increasing conversational turn-taking over the sampled SES range.

Despite the positive effects on children's language environments, there were no between group differences in children's scores on language, nonverbal IQ, or executive functioning assessments, in contrast with the findings of Neville and colleagues (Neville et al., 2013). Potential reasons for this non-replication include variation in participant age (participants in the current study were on average one year older); the use of different standardized assessments (e.g., the present study had more comprehensive measures of receptive and expressive language, while the original study evaluated only receptive language); and differences in the racial/ethnic, geographical, and cultural background of participating families (e.g., the present study involved more participants from minority backgrounds than the original). Future research is needed to determine which populations receive the most benefit from this intervention and

## Running Head: LANGUAGE EXPERIENCE AND NEUROPLASTICITY

whether tailoring to specific recipients may yield more widespread positive results in children's cognition.

Given the goal of this study to highlight mechanisms of experience-driven language development, the most intriguing findings are the relationships between the changes in conversational turn-taking and plasticity in children's verbal and nonverbal cognition as well as brain structure. Previous studies investigating neural mechanisms underlying language input-output relationships have all been cross-sectional (Merz et al., 2020; Romeo, Leonard, et al., 2018; Romeo, Segaran, et al., 2018), which limits the ability to make causal interpretations. Although the present findings are still correlational, by demonstrating that *longitudinal* changes in children's language environments are associated with language development and structural neuroplasticity, this provides the strongest evidence to date that children's language experience—and specifically adult-child conversational turn-taking—promotes cortical growth in left perisylvian brain regions supporting children's language development in early childhood.

The two brain regions that exhibited plasticity associated with conversational turns are well-established as core hubs of the language network. The left IFG, often referred to as Broca's area, is causally involved in speech production and frequently implicated in receptive language and reading tasks (for review, see Friederici, 2011). A prominent theory suggests that Broca's area operates as a convergence zone in which the phonological, syntactic, and semantic components of language are unified into a coherent linguistic representation (Hagoort, 2014). Other theories posit that Broca's area serves a more domain-general function of processing hierarchical structures, of which language is one instantiation (Tettamanti & Weniger, 2006), or that subregions of Broca's area selectively support language processing and diverse set of attentionally demanding perceptual and cognitive tasks (Fedorenko & Blank, 2020). Indeed, the left IFG is a part of the dorsolateral prefrontal cortex which supports higher-level nonverbal skills

## Running Head: LANGUAGE EXPERIENCE AND NEUROPLASTICITY

such as fluid reasoning (Ferrer et al., 2009), as well as a broader prefrontal network supporting goal-directed behavior and executive functioning skills such as working memory, cognitive control, cognitive flexibility, inhibition, and selective attention (Diamond, 2013; Miller & Cohen, 2001). Conversational turn-taking may engage many of these executive processes, such as utilizing working memory to remember previous statements in the conversation, or inhibiting speech until the previous speaker is done. The finding that changes in conversational turns correlate not only with language growth, but also changes in nonverbal cognition and executive function, suggests that conversational turn-taking may directly support the development of executive processes through either shared or adjacent prefrontal mechanisms.

Furthermore, the left SMG, located at the intersection of the inferior parietal lobe and posterior temporal lobe, also subserves aspects of language and nonverbal cognition. The left SMG is frequently considered to be a part of Wernicke's area (Tremblay & Dick, 2016), which is critically involved in language comprehension, especially as it relates to processing the phonological components of words and recoding phonology to lexical cues (Oberhuber et al., 2016). Furthermore, the left temporoparietal junction, located at the posterior edge of the SMG, is recognized as a core region underlying social cognition, including the ability to reason about others' thoughts and beliefs, known as theory of mind (Adolphs, 2009), which undergoes significant development during the age range studied (Richardson et al., 2018). Conversational turn-taking necessarily requires social reciprocity and may promote theory of mind processes such as perspective taking when interacting with an interlocutor; in return, some researchers theorize that language acquisition and growth requires such social interaction (e.g., Kuhl, 2007; Tamis-LeMonda et al., 2014). The finding that SMG plasticity mediates the relationship between conversational turns and language score changes suggests that social interactive processes may drive language development during this important developmental period. While the present study did not directly probe the effects of the intervention on children's social cognition, future

## Running Head: LANGUAGE EXPERIENCE AND NEUROPLASTICITY

research is needed to comprehensively explore the complex relationships amongst these cognitive domains during their co-development in preschool period.

The present results add to the growing number of studies using both automated daylong recordings as well as transcription techniques that are converging on findings that conversational turns are one of the strongest predictors of children's linguistic, cognitive, and neural development (Ferjan Ramírez et al., 2020; Gilkerson et al., 2018; Hirsh-Pasek et al., 2015; Leech & Rowe, 2020; Merz et al., 2020; Romeo, Leonard, et al., 2018; Romeo, Segaran, et al., 2018; Zimmerman et al., 2009). This raises empirical questions about what component of conversational turn-taking confers such benefits to child development, over and above other measures of language input. Children's language exposure is multifaceted and includes linguistic (e.g., syntax), social-interactive (e.g., contingency), and conceptual (i.e., topics of discussion) dimensions (Rowe & Snow, 2020). Conversational turns not only communicate linguistic and conceptual content, but they necessitate an interactive social exchange between the adult and child. Turn-taking exchanges may create a feedback loop in which the child has opportunities to practice their developing language with an attentive partner, while also providing the adult with increased opportunities to observe the child's language level and adapt their speech to an optimal level of complexity. However, one limitation of the present methods is that LENA provides a window into the *frequency* of turn-taking, but does not provide information on the *content* of conversational exchanges, nor the *physical and social environments* in which they take place. Such information is critical to drive conclusions regarding the mechanisms by which conversational turns support children's cognitive development. Future studies should investigate how the three dimensions of language input interact and evolve over ontogeny to support children's language development and related neurocognitive domains.

## Running Head: LANGUAGE EXPERIENCE AND NEUROPLASTICITY

Another limitation of this study is that the strongest results are correlational, which prevents causal conclusions. The difference between significant longitudinal correlations and the lack of a group effect on cognitive and brain measures appears to arise from large individual variability within both the intervention and control groups. Although the intervention did have significant effects on conversational turn-taking, about half of families exhibited increases and half decreases. It is unclear what factors drive within-family variation in communication practices, and how interventions act on this variation. It is striking, however, that a mere 10-20 weeks of fluctuating home language experience relates to fluctuations in language and cognitive abilities as well as brain anatomy. Such rapid cortical plasticity has been noted in other child and adolescent intervention studies, such as after 2 weeks of executive cognition training (Hoekzema et al., 2011), 6 weeks of reading intervention (Romeo, Christodoulou, et al., 2018), 5 weeks of inhibitory control training (Delalande et al., 2020), 12 weeks of exercise training (Szulc-Lerch et al., 2018), and 3 months of experience playing Tetris (Haier et al., 2009).

Additional limitations may constrain generalization. Because families were recruited from public charter schools which require entry to a lottery for enrollment, the sample may not be representative of broader populations of families who lack the resources to engage with such opportunities. Furthermore, the families who signed up for an intervention may have been more attuned to their children's developmental needs. Future studies in population-based settings (e.g., Wong et al., 2020) are needed to ensure equal access to family support programs. Finally, this intervention was designed for families in Western societies where adult-child conversation, child expressiveness, and formal education are valued. As such, the neurocognitive effects of the intervention may not generalize to other cultures where such practices are rare or not valued, nor may such approaches be appropriate for widespread practice. It is critical that interventions to family practices take into account caregivers' goals for their children's development and futures.

## Running Head: LANGUAGE EXPERIENCE AND NEUROPLASTICITY

This study is the first to reveal mechanisms of neuroplasticity that relate children’s language environments to their linguistic and cognitive development. Beyond illuminating neurobiological mechanisms, this study has important implications for education and public policy. It suggests the need for developing and expanding programs to support parents in providing high-quality language environments for their children, while also reducing systemic barriers that impede caregivers’ ability to spend time with children and engage in conversational turn-taking. Such multipronged approaches may help to ensure optimal developmental outcomes for all children.



## Running Head: LANGUAGE EXPERIENCE AND NEUROPLASTICITY

### **Acknowledgements and Funding**

Research was funded by the Walton Family Foundation (to M.R.W.), National Institute of Child Health and Human Development (to RRR), Harvard Mind Brain Behavior Grant (to RRR), and a gift from David Pun Chan (to JDEG). We thank the University of Oregon Brain Development Lab (including Eric Pakulak, Zayra Longoria, Jimena Santillan, and Helen Neville) for providing the curriculum and training the interventionists to fidelity; Transforming Education, 1647 Families, and John Connolly; Glennys Sanchez, Marta Rivera, Samilla Quiroa, Barney Arnold, Violeta Vicario, and Blanca Valentin for delivering the intervention; the Athinoula A. Martinos Imaging Center at the McGovern Institute for Brain Research (MIT), including Atshusi Takahashi, Steve Shannon, and Sheeba Arnold for MRI assistance; Kelly Halverson, Emilia Motroni, Lauren Pesta, Veronica Wheaton, and Christina Yu for assistance in administering behavioral assessments; and to all participating schools and families.

### **Declaration of Interest**

No authors have any competing interests to report.

### **Author Contributions**

RRR and JDEG developed the study concept. RRR, JAL, ES, APM, MLR, MRW, and JDEG designed the study. RRR, JAL, STR, and MT collected the data. RRR, JAL, HMG, STR, and MT preprocessed, scored, and curated the data. RRR performed the data analysis and interpretation, under the supervision of JDEG and MLR. RRR drafted the manuscript and JDEG, MLR, APM, JAL, and MET provided revisions. All authors approved the final version of the manuscript for submission.

## Running Head: LANGUAGE EXPERIENCE AND NEUROPLASTICITY

### References

- Adolphs, R. (2009). The Social Brain: Neural Basis of Social Knowledge. *Annual Review of Psychology*, 60(1), 693-716.
- APA Task Force on Race and Ethnicity Guidelines in Psychology. (2019). APA Guidelines on Race and Ethnicity: Promoting Responsiveness and Equity.
- Brito, N. H., Troller-Renfree, S. V., Leon-Santos, A., Isler, J. R., Fifer, W. P., & Noble, K. G. (2020). Associations among the home language environment and neural activity during infancy. *Developmental Cognitive Neuroscience*, 43, 100780.
- Delalande, L., Moyon, M., Tissier, C., Dorriere, V., Guillois, B., Mevell, K., . . . Borst, G. (2020). Complex and subtle structural changes in prefrontal cortex induced by inhibitory control training from childhood to adolescence. *Developmental Science*, 23(4), e12898.
- Desikan, R. S., Segonne, F., Fischl, B., Quinn, B. T., Dickerson, B. C., Blacker, D., . . . Killiany, R. J. (2006). An automated labeling system for subdividing the human cerebral cortex on MRI scans into gyral based regions of interest. *Neuroimage*, 31(3), 968-980.
- Diamond, A. (2013). Executive Functions. *Annual Review of Psychology*, 64(1), 135-168.
- Duncan, G. J., & Magnuson, K. (2012). Socioeconomic status and cognitive functioning: Moving from correlation to causation. *Wiley Interdisciplinary Reviews: Cognitive Science*, 3(3), 377-386.
- Dunn, L. M., & Dunn, D. M. (2007). *Peabody picture vocabulary test* (4th ed.). Bloomington, MN: Pearson.
- Fedorenko, E., & Blank, I. A. (2020). Broca's Area Is Not a Natural Kind. *Trends in Cognitive Sciences*, 24(4), 270-284.
- Ferjan Ramirez, N., Lytle, S. R., Fish, M., & Kuhl, P. K. (2019). Parent coaching at 6 and 10 months improves language outcomes at 14 months: A randomized controlled trial. *Developmental Science*, 22, e12762.

## Running Head: LANGUAGE EXPERIENCE AND NEUROPLASTICITY

- Ferjan Ramírez, N., Lytle, S. R., & Kuhl, P. K. (2020). Parent coaching increases conversational turns and advances infant language development. *Proceedings of the National Academy of Sciences*, *117*(7), 3484-3491.
- Ferrer, E., O'Hare, E. D., & Bunge, S. A. (2009). Fluid reasoning and the developing brain. *Frontiers in Neuroscience*, *3*(1), 46-51.
- Ford, M., Baer, C. T., Xu, D., Yapanel, U., & Gray, S. (2008). The LENA language environment analysis system: Audio specifications of the DLP-0121: Technical report LTR-03-2.
- Friederici, A. D. (2011). The brain basis of language processing: From structure to function. *Physiological Review*, *91*(4), 1357-1392.
- Gilkerson, J., Richards, J. A., Warren, S. F., Montgomery, J. K., Greenwood, C. R., Kimbrough Oller, D., . . . Paul, T. D. (2017). Mapping the early language environment using all-day recordings and automated analysis. *American Journal of Speech Language Pathology*, *26*(2), 248-265.
- Gilkerson, J., Richards, J. A., Warren, S. F., Oller, D. K., Russo, R., & Vohr, B. (2018). Language Experience in the Second Year of Life and Language Outcomes in Late Childhood. *Pediatrics*, *142*(4).
- Hagler, D. J., Jr., Saygin, A. P., & Sereno, M. I. (2006). Smoothing and cluster thresholding for cortical surface-based group analysis of fMRI data. *Neuroimage*, *33*(4), 1093-1103.
- Hagoort, P. (2014). Nodes and networks in the neural architecture for language: Broca's region and beyond. *Current Opinion in Neurobiology*, *28*, 136-141.
- Haier, R. J., Karama, S., Leyba, L., & Jung, R. E. (2009). MRI assessment of cortical thickness and functional activity changes in adolescent girls following three months of practice on a visual-spatial task. *BMC Research Notes*, *2*, 174.
- Heidlage, J. K., Cunningham, J. E., Kaiser, A. P., Trivette, C. M., Barton, E. E., Frey, J. R., & Roberts, M. Y. (2020). The effects of parent-implemented language interventions on

## Running Head: LANGUAGE EXPERIENCE AND NEUROPLASTICITY

- child linguistic outcomes: A meta-analysis. *Early Childhood Research Quarterly*, 50, 6-23.
- Helms, J. E., Jernigan, M., & Mascher, J. (2005). The meaning of race in psychology and how to change it: a methodological perspective. *American Psychologist*, 60(1), 27-36.
- Hirsh-Pasek, K., Adamson, L. B., Bakeman, R., Owen, M. T., Golinkoff, R. M., Pace, A., . . . Suma, K. (2015). The contribution of early communication quality to low-income children's language success. *Psychological Science*, 26(7), 1071-1083.
- Hoekzema, E., Carmona, S., Ramos-Quiroga, J. A., Barba, E., Bielsa, A., Tremols, V., . . . Vilarroya, O. (2011). Training-induced neuroanatomical plasticity in ADHD: a tensor-based morphometric study. *Human Brain Mapping*, 32(10), 1741-1749.
- Hoff, E. (2003). The specificity of environmental influence: Socioeconomic status affects early vocabulary development via maternal speech. *Child Development*, 74(5), 1368-1378.
- Huttenlocher, J., Vasilyeva, M., Cymerman, E., & Levine, S. (2002). Language input and child syntax. *Cognitive Psychology*, 45, 337-374.
- Klapwijk, E. T., van de Kamp, F., van der Meulen, M., Peters, S., & Wierenga, L. M. (2019). Qoala-T: A supervised-learning tool for quality control of FreeSurfer segmented MRI data. *Neuroimage*, 189, 116-129.
- Kuhl, P. K. (2007). Is speech learning 'gated' by the social brain? *Developmental Science*, 10(1), 110-120.
- Leech, K. A., & Rowe, M. L. (2020). An intervention to increase conversational turns between parents and young children. *Journal of Child Language*, 1-14.
- Leung, C. Y. Y., Hernandez, M. W., & Suskind, D. L. (2020). Enriching home language environment among families from low-SES backgrounds: A randomized controlled trial of a home visiting curriculum. *Early Childhood Research Quarterly*, 50, 24-35.
- McGillion, M., Pine, J. M., Herbert, J. S., & Matthews, D. (2017). A randomised controlled trial to test the effect of promoting caregiver contingent talk on language development in infants

## Running Head: LANGUAGE EXPERIENCE AND NEUROPLASTICITY

- from diverse socioeconomic status backgrounds. *Journal of Child Psychology and Psychiatry*, 58(10), 1122–1131.
- Merz, E. C., Maskus, E. A., Melvin, S. A., He, X., & Noble, K. G. (2020). Socioeconomic disparities in language input are associated with children's language-related brain structure and reading skills. *Child Development*, 91, 846-860.
- Miller, E. K., & Cohen, J. D. (2001). An integrative theory of prefrontal cortex function. *Annual Review of Neuroscience*, 24(1), 167-202.
- Neville, H. J., Stevens, C., Pakulak, E., Bell, T. A., Fanning, J., Klein, S., & Isbell, E. (2013). Family-based training program improves brain function, cognition, and behavior in lower socioeconomic status preschoolers. *Proceedings of the National Academy of Sciences of the United States of America*, 110(29), 12138-12143.
- Oberhuber, M., Hope, T. M. H., Seghier, M. L., Parker Jones, O., Prejawa, S., Green, D. W., & Price, C. J. (2016). Four Functionally Distinct Regions in the Left Supramarginal Gyrus Support Word Processing. *Cerebral Cortex*, 26(11), 4212-4226.
- Pace, A., Luo, R., Hirsh-Pasek, K., & Golinkoff, R. M. (2017). Identifying pathways between socioeconomic status and language development. *Annual Review of Linguistics*, 3(1), 285-308.
- Remer, J., Croteau-Chonka, E., Dean, D. C., 3rd, D'Arpino, S., Dirks, H., Whiley, D., & Deoni, S. C. L. (2017). Quantifying cortical development in typically developing toddlers and young children, 1-6 years of age. *Neuroimage*, 153, 246-261.
- Richardson, H., Lisandrelli, G., Riobueno-Naylor, A., & Saxe, R. (2018). Development of the social brain from age three to twelve years. *Nature Communications*, 9(1), 1027.
- Romeo, R. R., Christodoulou, J. A., Halverson, K. K., Murtagh, J., Cyr, A. B., Schimmel, C., . . . Gabrieli, J. D. E. (2018). Socioeconomic status and reading disability: Neuroanatomy and plasticity in response to intervention. *Cerebral Cortex*, 28(7), 2297-2312.

## Running Head: LANGUAGE EXPERIENCE AND NEUROPLASTICITY

- Romeo, R. R., Leonard, J. A., Robinson, S. T., West, M. R., Mackey, A. P., Rowe, M. L., & Gabrieli, J. D. E. (2018). Beyond the “30 million word gap:” Children’s conversational exposure is associated with language-related brain function. *Psychological Science*, 29(5), 700-710.
- Romeo, R. R.\*, Leonard, J. A.\*, Scherer, E., Robinson, S. T., Takada, M., Mackey, A. P., . . . Gabrieli, J. D. E. (under review). Replication and extension of a family-based training program to improve cognitive abilities in young children. \*Co-first authorship
- Romeo, R. R., Segaran, J., Leonard, J. A., Robinson, S. T., West, M. R., Mackey, A. P., . . . Gabrieli, J. D. E. (2018). Language exposure relates to structural neural connectivity in childhood. *Journal of Neuroscience*, 38(36), 7870-7877.
- Rowe, M. L. (2012). A longitudinal investigation of the role of quantity and quality of child-directed speech in vocabulary development. *Child Dev*, 83(5), 1762-1774.
- Rowe, M. L. (2018). Understanding socioeconomic differences in parents’ speech to children. *Child Development Perspectives*, 12, 122-127.
- Rowe, M. L., & Goldin-Meadow, S. (2009). Differences in early gesture explain SES disparities in child vocabulary size at school entry. *Science*, 323(5916), 951-953.
- Rowe, M. L., & Snow, C. E. (2020). Analyzing input quality along three dimensions: interactive, linguistic, and conceptual. *Journal of Child Language*, 47(1), 5-21.
- Schwab, J. F., & Lew-Williams, C. (2016). Language learning, socioeconomic status, and child-directed speech. *Wiley Interdisciplinary Reviews: Cognitive Science*, 7(4), 264-275.
- Szulc-Lerch, K. U., Timmons, B. W., Bouffet, E., Laughlin, S., de Medeiros, C. B., Skocic, J., . . . Mabbott, D. J. (2018). Repairing the brain with physical exercise: Cortical thickness and brain volume increases in long-term pediatric brain tumor survivors in response to a structured exercise intervention. *Neuroimage Clinical*, 18, 972-985.
- Tamis-LeMonda, C. S., Kuchirko, Y., & Song, L. (2014). Why is infant language learning facilitated by parental responsiveness? *Curr Dir Psychol Sci*, 23(2), 121-126.

## Running Head: LANGUAGE EXPERIENCE AND NEUROPLASTICITY

Tettamanti, M., & Weniger, D. (2006). Broca's area: A supramodal hierarchical processor?

*Cortex*, 42(4), 491-494.

Tisdall, M. D., Hess, A. T., Reuter, M., Meintjes, E. M., Fischl, B., & van der Kouwe, A. J.

(2012). Volumetric navigators for prospective motion correction and selective reacquisition in neuroanatomical MRI. *Magnetic Resonance in Medicine*, 68(2), 389-399.

van der Kouwe, A. J., Benner, T., Salat, D. H., & Fischl, B. (2008). Brain morphometry with

multiecho MPRAGE. *Neuroimage*, 40(2), 559-569.

Walker, D., Greenwood, C., Hart, B., & Carta, J. (1994). Prediction of school outcomes based

on early language production and socioeconomic factors. *Child Development*, 65, 606-621.

Wechsler, D. (2012). *Wechsler preschool and primary scale of intelligence* (4th ed.).

Bloomington, MN: Pearson.

Wiig, E. H., Semel, E. M., & Secord, W. (2013). *Clinical evaluation of language fundamentals*

(5th ed.). Bloomington, MN: Pearson.

Wong, K., Thomas, C., & Boben, M. (2020). Providence talks: A citywide partnership to address

early childhood language development. *Studies in Educational Evaluation*, 64, 100818.

Xu, D., Yapanel, U., & Gray, S. (2009). Reliability of the LENA language environment analysis

system in young children's natural home environment: Technical report LTR-05-2.

Zimmerman, F. J., Gilkerson, J., Richards, J. A., Christakis, D. A., Xu, D., Gray, S., & Yapanel,

U. (2009). Teaching by listening: The importance of adult-child conversations to language development. *Pediatrics*, 124(1), 342-349.

## Running Head: LANGUAGE EXPERIENCE AND NEUROPLASTICITY

**Table 1. Baseline scores and intervention effects on language environment and cognition**

| Measure                            | Pre-Test                   |                          | Post-Test                  |                          | Time*Group Interaction<br>$\eta^2$ ( $p$ ) |
|------------------------------------|----------------------------|--------------------------|----------------------------|--------------------------|--------------------------------------------|
|                                    | Intervention<br>M (SD) [n] | Control<br>M (SD) [n]    | Intervention<br>M (SD) [n] | Control<br>M (SD) [n]    |                                            |
| Adult Words per Hour               | 1106.50<br>(381.61) [23]   | 1258.81<br>(489.72) [18] | 1325.27<br>(419.16) [21]   | 1183.68<br>(451.35) [16] | .076 (.098) <sup>†</sup>                   |
| Conversational Turns<br>per Hour   | 47.03<br>(18.88) [23]      | 55.77<br>(21.79) [18]    | 51.63<br>(20.02) [21]      | 48.71<br>(20.73) [16]    | .159 (.014)*                               |
| Child Vocalizations<br>per Hour    | 206.71<br>(83.40) [23]     | 222.84<br>(91.39) [18]   | 216.63<br>(85.71) [21]     | 233.59<br>(111.72) [16]  | .002 (n.s.)                                |
| Language Composite                 | 98.40 (16.43)<br>[24]      | 100.18 (15.73)<br>[25]   | 101.83 (14.54)<br>[24]     | 103.88 (13.36)<br>[25]   | .000 (n.s.)                                |
| Nonverbal IQ<br>Composite          | 9.42 (2.23)<br>[24]        | 9.93 (2.23)<br>[25]      | 10.60 (2.18)<br>[24]       | 10.45 (2.26)<br>[25]     | .066 (.074) <sup>†</sup>                   |
| Executive Functioning<br>Composite | -.15 (.63)<br>[24]         | 0.05 (.77)<br>[25]       | 0.05 (.54)<br>[24]         | -.09 (.86)<br>[25]       | .096 (.031)*                               |

<sup>†</sup> $p < 0.1$ , \* $p < 0.05$

Descriptive and inferential statistics of standardized cognitive assessments and language environment measures, divided by assigned group and timepoint. Descriptive statistics include mean (M), standard deviation (SD), and subgroup sample size with valid measurements (n). Inferential statistics include effect size ( $\eta^2$ ) and corresponding p-value derived from repeated measures ANOVAs with timepoint (pre-test or post-test) within-subjects and assigned group (intervention or control) between subjects. Three participants assigned to the intervention who did not attend any sessions (non-compliers) are excluded from inferential analyses (see methods). Intent-to-treat analyses including these children are reported in Supplementary Table 2.



## Running Head: LANGUAGE EXPERIENCE AND NEUROPLASTICITY

**Table 2. Correlations amongst language environment and cognition change scores**

|                                             | AW    | CT     | CV   | Lang | NVIQ | EF |
|---------------------------------------------|-------|--------|------|------|------|----|
| Change in Adult Words (AW)                  | 1     |        |      |      |      |    |
| Change in Conversational Turns (CT)         | .44** | 1      |      |      |      |    |
| Change in Child Vocalizations (CV)          | 0.06  | .65*** | 1    |      |      |    |
| Change in Language Scores (Lang)            | 0.21  | .37*   | 0.07 | 1    |      |    |
| Change in Nonverbal IQ Scores (NVIQ)        | 0.11  | .39*   | 0.21 | 0.18 | 1    |    |
| Change in Executive Functioning Scores (EF) | 0.28† | .48**  | 0.18 | 0.05 | 0.18 | 1  |

† $p < 0.1$ , \* $p < 0.05$ , \*\* $p < 0.01$ , \*\*\* $p < 0.001$

Correlation matrix of change scores in LENA language environment measures and standardized cognitive assessments, collapsed across both intervention (including comply and non-comply) and control groups. Change scores represent posttest minus pretest scores. Valid pre-post LENA  $n=39$  and cognitive  $n=52$ .

## Running Head: LANGUAGE EXPERIENCE AND NEUROPLASTICITY

**Table 3. Cortical thickness changes associated with changes in conversational turns**

| Region of Cluster<br>(Desikan-Killiany<br>Atlas) | Approximate<br>Brodmann<br>Areas | Area of<br>cluster<br>(mm <sup>2</sup> ) | Peak<br>Significance<br>( $-\log_{10} p$ ) | Peak MNI Coordinate |       |      | Cluster-<br>wise $p$ |
|--------------------------------------------------|----------------------------------|------------------------------------------|--------------------------------------------|---------------------|-------|------|----------------------|
|                                                  |                                  |                                          |                                            | x                   | y     | z    |                      |
| Left inferior frontal<br>gyrus (IFG)             | 44, 45                           | 1912.32                                  | 5.450                                      | -50.8               | 21.3  | 18.0 | 0.00020              |
| Left supramarginal<br>gyrus (SMG)                | 40                               | 1579.73                                  | 4.578                                      | -42.3               | -35.7 | 21.9 | 0.00020              |

Summary of clusters in which symmetrized percent change in cortical thickness are significantly correlated with changes in children's experienced conversational turns ( $n=36$  children, collapsed across groups, controlling for age and gender). Regional labels are derived from the Desikan-Killiany gyral-based atlas (Desikan et al., 2006).

## Running Head: LANGUAGE EXPERIENCE AND NEUROPLASTICITY

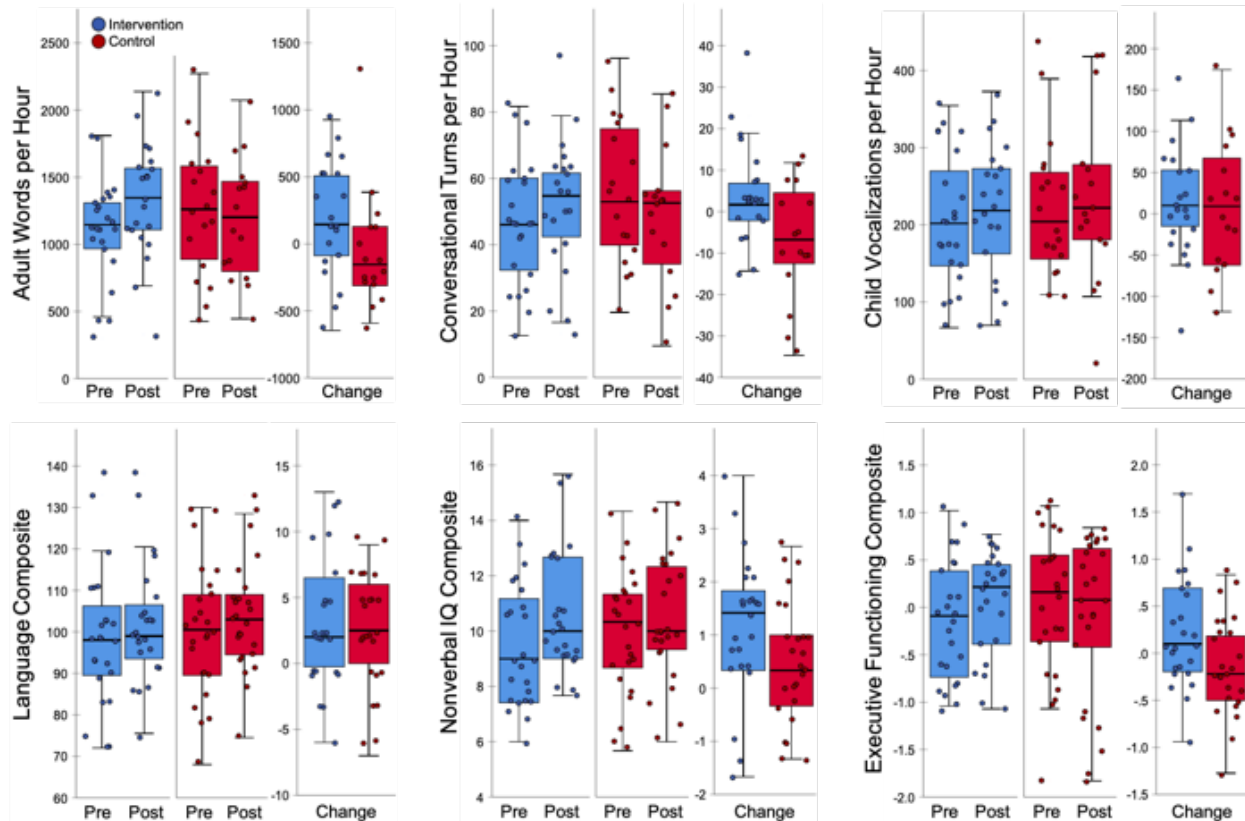

**Figure 1.** Pre-to-post changes in language environment measures (top) and standardized cognitive assessments (bottom), split by intervention group (intervention = blue, control = red). Change scores represent posttest minus pretest scores. Each dot represents a participant, overlaid on boxplots representing subgroup median (dark center line), first and third quartiles (box edges), and the maximum and minimum values no larger than 1.5 times the interquartile range (whiskers). See Table 1 for corresponding descriptive and inferential statistics.

## Running Head: LANGUAGE EXPERIENCE AND NEUROPLASTICITY

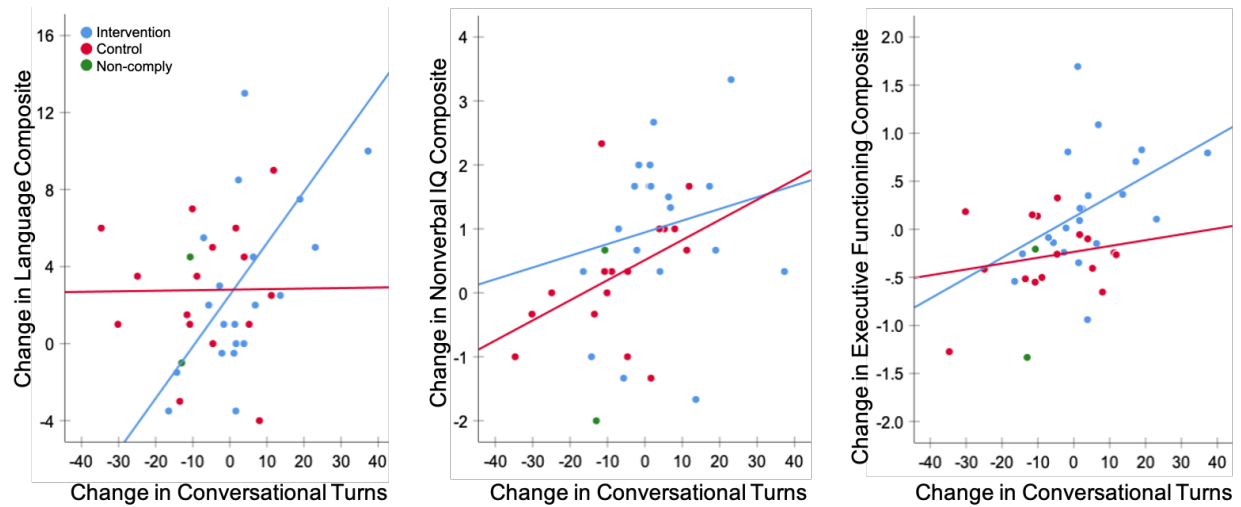

**Figure 2.** Scatterplots of the pre-to-post change in standardized cognitive measures as a function of change in conversational turns. Colored lines represent the least-squares regression trendline in the intervention ( $n=21$ , blue) and control ( $n=16$ , red) groups, excluding two participants assigned to the intervention who did not attend (green). Full sample correlations were significant for all three cognitive measures (see Table 2), and the interaction between groups was significant for language scores (see text).

## Running Head: LANGUAGE EXPERIENCE AND NEUROPLASTICITY

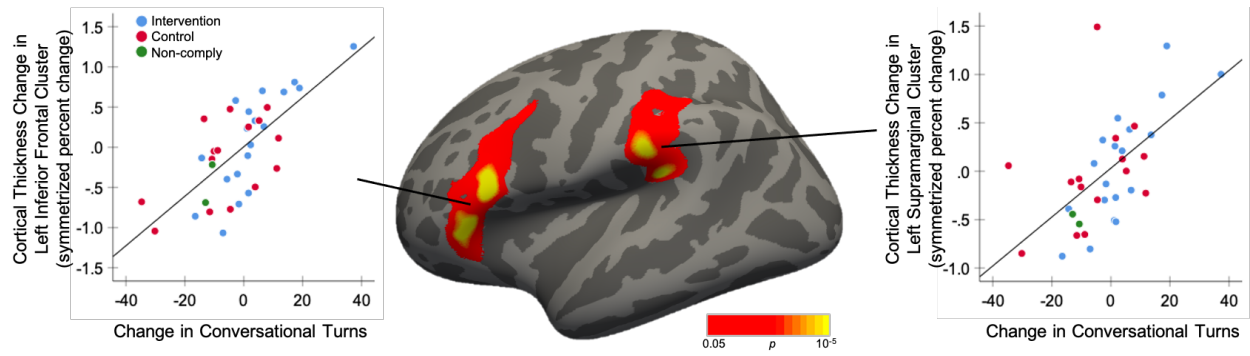

**Figure 3.** Clusters where changes in cortical thickness are significantly correlated with changes in children's experienced conversational turns ( $n=36$  children, collapsed across groups, controlling for age and gender). Scatterplots represent the average symmetrized percent change in cortical thickness across each vertex per cluster as a function of the pre-to-post changes in conversational turns. Trendlines are for illustrative purposes only.
